# Supplementary material for: Salt Stress Tolerance of Dark Septate Endophytes Is Independent of Melanin Accumulation
Source: Front Microbiol. 2020 Dec 10;11:562931. doi: 10.3389/fmicb.2020.562931 (PMC7758464; doi:10.3389/fmicb.2020.562931)
Supplement: Supplementary file 1 [file Data_Sheet_1.docx]

Supplementary Material


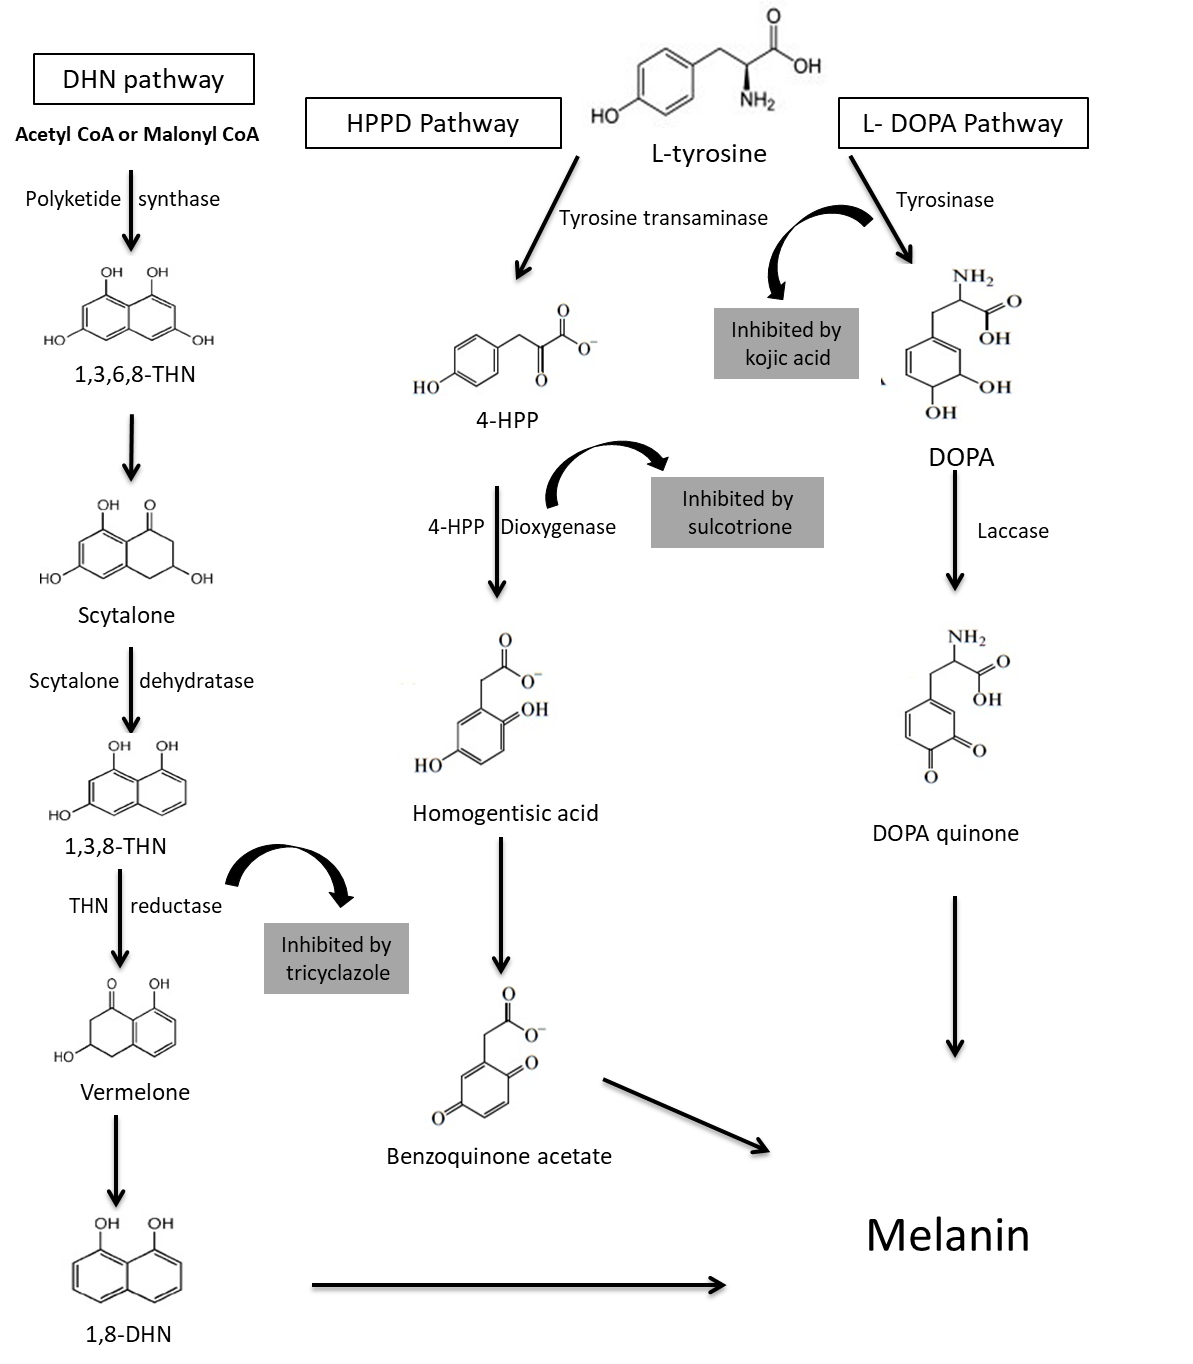


**Figure S1: Illustration of the three possible melanin biosynthesis pathways in fungi and the melanin inhibitor for each pathway (Wheeler and Klich 1995; Bell and Wheeler 1986; Butler and Day 1998; Langfelder et al. 2003; Cabanes et al. 1994; Carreira et al. 2001; Coon et al. 1994; Secor 1994).**

1,3,6,8-THN: 1,3,6,8 tetrahydroxynaphthalene, 1,3,8-THN: 1,3,8-trihydroxynaphthalene, 1,8-DHN: 1,8-dihyroxynaphthalene and DOPA: 3,4 dihydroxyphenylalanine.


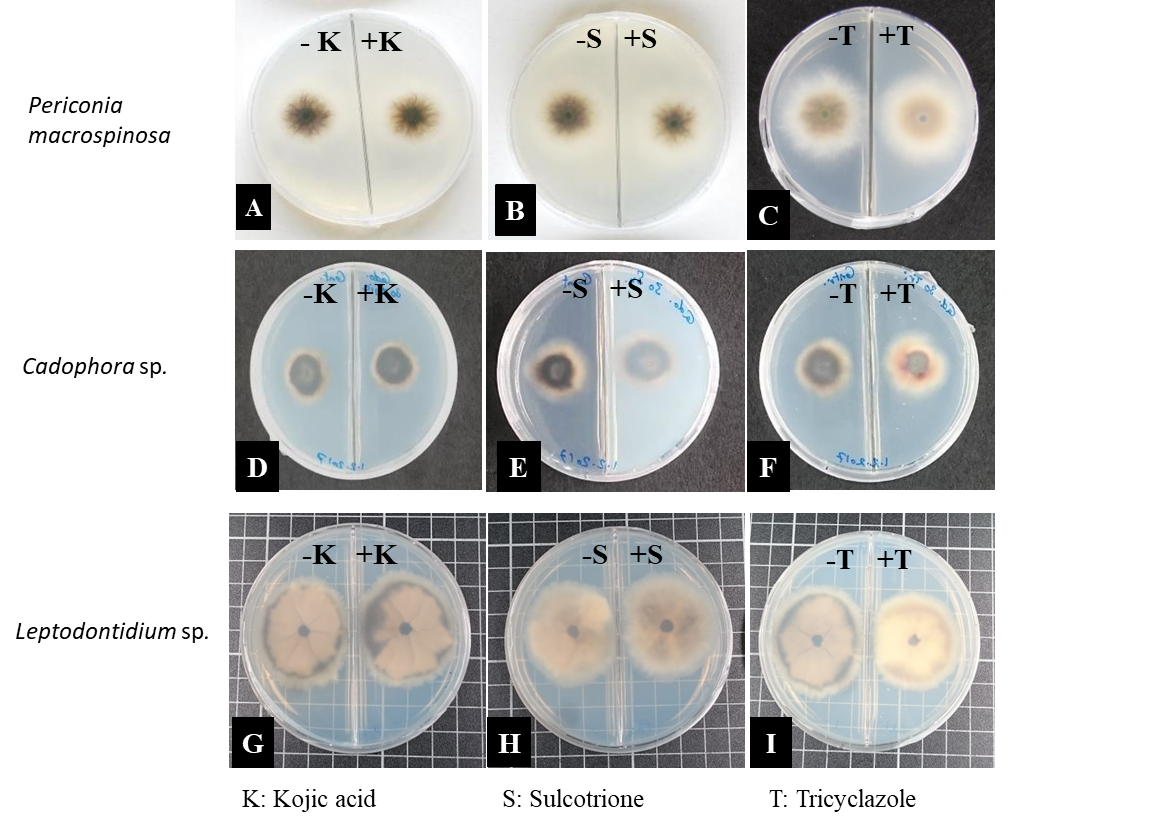


**Figure S2: Impact of three melanin biosynthesis inhibitors on the pigmentation of *Periconia macrospinosa, Cadophora* sp. and *Leptodontidium* sp.** DSEs were grown on Pachlewski media enriched with either kojic acid (K), sulcotrione (S) or tricyclazole (T). Petri dishes were incubated at 25oC for 14 days. Melanin pigmentation were not inhibited in the presence of kojic acid and sulcotrione in *P. macrospinosa* (A and B), *Cadophora* sp. (D and E) and *Leptodontidium* sp. (G and H), while the melanin pigment was reduced by the addition of tricyclazole visible in *P. macrospinosa* (C), *Cadophora* sp. (F) and *Leptodontidium* sp. (I). The experiment has been repeated 3 times with 5 repetitions per each treatment obtaining similar results.

**References:**

Bell AA, Wheeler MH (1986) Biosynthesis and functions of fungal melanins. Annual Review of Phytopathology 24:411-451. doi:10.1146/annurev.py.24.090186.002211

Butler MJ, Day AW (1998) Fungal melanins: a review. Canadian Journal of Microbiology 44 (12):1115-1136. doi:10.1139/cjm-44-12-1115

Cabanes J, Chazarra S, Garciacarmona F (1994) Kojic acid, a cosmitic skin whitening agent, is a slow-binding inhibitor of catecholase activity of tyrosinase. Journal of Pharmacy and Pharmacology 46 (12):982-985. doi:10.1111/j.2042-7158.1994.tb03253.x

Carreira A, Ferreira LM, Loureiro V (2001) Brown pigments produced by *Yarrowia lipolytica* result from extracellular accumulation of homogentisic acid. Applied and Environmental Microbiology 67 (8):3463-3468. doi:10.1128/aem.67.8.3463-3468.2001

Coon SL, Kotob S, Jarvis BB, Wang SJ, Fuqua WC, Weiner RM (1994) Homogentisic acid is the product of MelA, which mediates melanogenesis in the marine bacterium *Shewanella colwelliana* D. Applied and Environmental Microbiology 60 (8):3006-3010

Langfelder K, Streibel M, Jahn B, Haase G, Brakhage AA (2003) Biosynthesis of fungal melanins and their importance for human pathogenic fungi. Fungal Genetics and Biology 38 (2):143-158. doi:10.1016/s1087-1845(02)00526-1

Secor J (1994) Inhibition of barnyardgrass 4-hydroxyphenylpyruvate dioxygenase by sulcotrione. Plant Physiology 106 (4):1429-1433. doi:10.1104/pp.106.4.1429

Wheeler MH, Klich MA (1995) The effects of tricyclazole, pyroquilon, phthalide, and related fungicides on the production of conidial wall pigments by *Penicillium* and *Aspergillus* species. Pesticide Biochemistry and Physiology 52 (2):125-136. doi:10.1006/pest.1995.1037
